# Supplementary material for: Species variability of Pinus elliottii, P. elliottii×P. caribaea, and P. massoniana in response to pinewood nematode infection
Source: PeerJ. 2025 Sep 5;13:e19990. doi: 10.7717/peerj.19990 (PMC12422270; doi:10.7717/peerj.19990)
Supplement: Supplemental Information 1 — note: I, infected; U, uninfected [file peerj-13-19990-s001.xlsx]

## Sheet: Sheet1
Time	Species	Nematode inoculation dose （no/plant）	Infection status
7 days	PM	2000	I	I	I	I	I	I	I	I	U	U	U	U	U	U	U	U	U	U	U	U	U	U	U	U
		4000	I	I	I	I	I	I	I	I	I	I	U	U	U	U	U	U	U	U	U	U	U	U	U	U
		8000	I	I	I	I	I	I	I	I	I	I	I	I	U	U	U	U	U	U	U	U	U	U	U	U
	EH	2000	I	I	U	U	U	U	U	U	U	U	U	U	U	U	U	U	U	U	U	U	U	U	U	U
		4000	I	I	I	I	I	I	U	U	U	U	U	U	U	U	U	U	U	U	U	U	U	U	U	U
		8000	I	I	I	I	U	U	U	U	U	U	U	U	U	U	U	U	U	U	U	U	U	U	U	U
	PEE	2000	I	I	U	U	U	U	U	U	U	U	U	U	U	U	U	U	U	U	U	U	U	U	U	U
		4000	I	I	I	I	I	I	I	I	I	I	I	I	U	U	U	U	U	U	U	U	U	U	U	U
		8000	I	I	I	I	I	I	I	I	I	I	I	I	I	I	U	U	U	U	U	U	U	U	U	U
14 days	PM	2000	I	I	I	I	I	I	I	I	I	I	I	I	I	I	I	I	U	U	U	U	U	U	U	U
		4000	I	I	I	I	I	I	I	I	I	I	I	I	I	I	I	I	I	I	I	I	U	U	U	U
		8000	I	I	I	I	I	I	I	I	I	I	I	I	I	I	I	I	I	I	I	I	U	U	U	U
	EH	2000	I	I	I	I	I	I	I	I	I	I	I	I	U	U	U	U	U	U	U	U	U	U	U	U
		4000	I	I	I	I	I	I	I	I	I	I	I	I	I	I	U	U	U	U	U	U	U	U	U	U
		8000	I	I	I	I	I	I	I	I	I	I	I	I	I	I	I	I	I	I	I	I	I	I	U	U
	PEE	2000	I	I	I	I	I	I	I	I	I	I	I	I	U	U	U	U	U	U	U	U	U	U	U	U
		4000	I	I	I	I	I	I	I	I	I	I	I	I	I	I	I	I	I	I	U	U	U	U	U	U
		8000	I	I	I	I	I	I	I	I	I	I	I	I	I	I	I	I	I	I	I	I	I	I	U	U
21 days	PM	2000	I	I	I	I	I	I	I	I	I	I	I	I	I	I	I	I	I	I	I	I	U	U	U	U
		4000	I	I	I	I	I	I	I	I	I	I	I	I	I	I	I	I	I	I	I	I	I	I	U	U
		8000	I	I	I	I	I	I	I	I	I	I	I	I	I	I	I	I	I	I	I	I	U	U	U	U
	EH	2000	I	I	I	I	I	I	I	I	I	I	I	I	I	I	I	I	U	U	U	U	U	U	U	U
		4000	I	I	I	I	I	I	I	I	I	I	I	I	I	I	I	I	I	I	I	I	U	U	U	U
		8000	I	I	I	I	I	I	I	I	I	I	I	I	I	I	I	I	I	I	I	I	I	I	I	I
	PEE	2000	I	I	I	I	I	I	I	I	I	I	I	I	I	I	I	I	I	I	I	I	U	U	U	U
		4000	I	I	I	I	I	I	I	I	I	I	I	I	I	I	I	I	I	I	I	I	U	U	U	U
		8000	I	I	I	I	I	I	I	I	I	I	I	I	I	I	I	I	I	I	I	I	I	I	I	I
28 days	PM	2000	I	I	I	I	I	I	I	I	I	I	I	I	I	I	I	I	I	I	I	I	U	U	U	U
		4000	I	I	I	I	I	I	I	I	I	I	I	I	I	I	I	I	I	I	I	I	I	I	U	U
		8000	I	I	I	I	I	I	I	I	I	I	I	I	I	I	I	I	I	I	I	I	I	I	U	U
	EH	2000	I	I	I	I	I	I	I	I	I	I	I	I	I	I	I	I	I	I	I	I	U	U	U	U
		4000	I	I	I	I	I	I	I	I	I	I	I	I	I	I	I	I	I	I	I	I	I	I	U	U
		8000	I	I	I	I	I	I	I	I	I	I	I	I	I	I	I	I	I	I	I	I	I	I	I	I
	PEE	2000	I	I	I	I	I	I	I	I	I	I	I	I	I	I	I	I	I	I	I	I	I	I	I	I
		4000	I	I	I	I	I	I	I	I	I	I	I	I	I	I	I	I	I	I	I	I	I	I	U	U
		8000	I	I	I	I	I	I	I	I	I	I	I	I	I	I	I	I	I	I	I	I	I	I	I	I
35 days	PM	2000	I	I	I	I	I	I	I	I	I	I	I	I	I	I	I	I	I	I	I	I	I	I	I	I
		4000	I	I	I	I	I	I	I	I	I	I	I	I	I	I	I	I	I	I	I	I	I	I	I	I
		8000	I	I	I	I	I	I	I	I	I	I	I	I	I	I	I	I	I	I	I	I	I	I	U	U
	EH	2000	I	I	I	I	I	I	I	I	I	I	I	I	I	I	I	I	I	I	I	I	I	I	I	I
		4000	I	I	I	I	I	I	I	I	I	I	I	I	I	I	I	I	I	I	I	I	I	I	I	I
		8000	I	I	I	I	I	I	I	I	I	I	I	I	I	I	I	I	I	I	I	I	I	I	I	I
	PEE	2000	I	I	I	I	I	I	I	I	I	I	I	I	I	I	I	I	I	I	I	I	I	I	I	I
		4000	I	I	I	I	I	I	I	I	I	I	I	I	I	I	I	I	I	I	I	I	I	I	U	U
		8000	I	I	I	I	I	I	I	I	I	I	I	I	I	I	I	I	I	I	I	I	I	I	I	I
note：I=infected， U=uninfected
