# Supplementary material for: Species variability of Pinus elliottii, P. elliottii×P. caribaea, and P. massoniana in response to pinewood nematode infection
Source: PeerJ. 2025 Sep 5;13:e19990. doi: 10.7717/peerj.19990 (PMC12422270; doi:10.7717/peerj.19990)
Supplement: Supplemental Information 2 — Each tree was assigned a disease severity index (0 to 4), where 0 indicated no symptoms, and 4 indicated severe wilting and chlorosis of more than 75% of the tree [file peerj-13-19990-s002.xlsx]

## Sheet: Sheet1
Time	Species	Nematode inoculation dose （no/plant）	Disease severity index
7 days	PM	2000	0	0	0	0	0	0	0	0	0	0	0	0	0	0	0	0	1	1	1	1	1	1	1	1
		4000	0	0	0	0	0	0	0	0	0	0	0	0	0	0	1	1	1	1	1	1	1	1	1	1
		8000	0	0	0	0	0	0	0	0	0	0	0	0	1	1	1	1	1	1	1	1	1	1	1	1
	EH	2000	0	0	0	0	0	0	0	0	0	0	0	0	0	0	0	0	0	0	0	0	0	0	1	1
		4000	0	0	0	0	0	0	0	0	0	0	0	0	0	0	0	0	0	0	1	1	1	1	1	1
		8000	0	0	0	0	0	0	0	0	0	0	0	0	0	0	0	0	0	0	0	0	1	1	1	1
	PEE	2000	0	0	0	0	0	0	0	0	0	0	0	0	0	0	0	0	0	0	0	0	0	0	1	1
		4000	0	0	0	0	0	0	0	0	0	0	0	0	1	1	1	1	1	1	1	1	1	1	1	1
		8000	0	0	0	0	0	0	0	0	0	0	1	1	1	1	1	1	1	1	1	1	1	1	1	1
14 days	PM	2000	0	0	0	0	0	0	0	0	1	1	1	1	1	1	1	1	1	1	1	1	1	1	2	2
		4000	0	0	0	0	1	1	1	1	1	1	1	1	1	1	1	1	1	1	1	1	1	1	2	2
		8000	0	0	0	0	1	1	1	1	1	1	1	1	1	1	1	1	1	1	2	2	2	2	2	2
	EH	2000	0	0	0	0	0	0	0	0	0	0	0	0	1	1	1	1	1	1	1	1	1	1	2	2
		4000	0	0	0	0	0	0	0	0	0	0	1	1	1	1	1	1	1	1	1	1	1	1	2	2
		8000	0	0	1	1	1	1	1	1	1	1	1	1	1	1	1	1	1	1	1	1	3	3	3	3
	PEE	2000	0	0	0	0	0	0	0	0	0	0	0	0	1	1	1	1	1	1	1	1	1	1	1	1
		4000	0	0	0	0	0	0	1	1	1	1	1	1	1	1	1	1	2	2	2	2	2	2	2	2
		8000	0	0	1	1	1	1	1	1	1	1	1	1	1	1	1	1	1	1	2	2	2	2	2	2
21 days	PM	2000	0	0	0	0	1	1	1	1	1	1	1	1	2	2	2	2	2	2	3	3	3	3	3	3
		4000	0	0	1	1	1	1	2	2	2	2	2	2	2	2	2	2	2	2	2	2	3	3	4	4
		8000	0	0	0	0	1	1	2	2	2	2	2	2	3	3	3	3	3	3	3	3	3	3	3	3
	EH	2000	0	0	0	0	0	0	0	0	1	1	1	1	2	2	2	2	2	2	2	2	2	2	3	3
		4000	0	0	0	0	1	1	1	1	1	1	2	2	2	2	2	2	2	2	2	2	3	3	4	4
		8000	2	2	2	2	2	2	2	2	3	3	3	3	3	3	3	3	3	3	3	3	4	4	4	4
	PEE	2000	0	0	0	0	1	1	1	1	1	1	1	1	1	1	2	2	2	2	2	2	2	2	2	2
		4000	0	0	0	0	1	1	1	1	1	1	2	2	2	2	2	2	2	2	2	2	3	3	3	3
		8000	1	1	1	1	1	1	2	2	2	2	2	2	2	2	2	2	3	3	3	3	3	3	3	3
28 days	PM	2000	0	0	0	0	1	1	2	2	3	3	3	3	3	3	3	3	3	3	3	3	4	4	4	4
		4000	0	0	2	2	2	2	2	2	3	3	3	3	3	3	3	3	3	3	3	3	4	4	4	4
		8000	0	0	1	1	2	2	2	2	2	2	3	3	3	3	4	4	4	4	4	4	4	4	4	4
	EH	2000	0	0	0	0	1	1	2	2	2	2	2	2	3	3	3	3	3	3	3	3	4	4	4	4
		4000	0	0	1	1	2	2	2	2	3	3	3	3	3	3	3	3	3	3	4	4	4	4	4	4
		8000	3	3	3	3	3	3	3	3	4	4	4	4	4	4	4	4	4	4	4	4	4	4	4	4
	PEE	2000	1	1	2	2	2	2	2	2	2	2	2	2	2	2	2	2	3	3	3	3	3	3	3	3
		4000	0	0	1	1	1	1	1	1	2	2	2	2	2	2	3	3	3	3	3	3	3	3	3	3
		8000	1	1	2	2	2	2	2	2	2	2	2	2	3	3	3	3	3	3	4	4	4	4	4	4
35 days	PM	2000	1	1	1	1	2	2	4	4	4	4	4	4	4	4	4	4	4	4	4	4	4	4	4	4
		4000	1	1	1	1	3	3	4	4	4	4	4	4	4	4	4	4	4	4	4	4	4	4	4	4
		8000	0	0	1	1	4	4	4	4	4	4	4	4	4	4	4	4	4	4	4	4	4	4	4	4
	EH	2000	2	2	2	2	2	2	3	3	3	3	3	3	3	3	3	3	4	4	4	4	4	4	4	4
		4000	1	1	2	2	3	3	3	3	4	4	4	4	4	4	4	4	4	4	4	4	4	4	4	4
		8000	4	4	4	4	4	4	4	4	4	4	4	4	4	4	4	4	4	4	4	4	4	4	4	4
	PEE	2000	2	2	2	2	2	2	3	3	3	3	3	3	3	3	3	3	4	4	4	4	4	4	4	4
		4000	0	0	1	1	1	1	3	3	4	4	4	4	4	4	4	4	4	4	4	4	4	4	4	4
		8000	2	2	3	3	3	3	4	4	4	4	4	4	4	4	4	4	4	4	4	4	4	4	4	4
