# Supplementary material for: Species variability of Pinus elliottii, P. elliottii×P. caribaea, and P. massoniana in response to pinewood nematode infection
Source: PeerJ. 2025 Sep 5;13:e19990. doi: 10.7717/peerj.19990 (PMC12422270; doi:10.7717/peerj.19990)
Supplement: Supplemental Information 3 — note: L, live; D, dead [file peerj-13-19990-s003.xlsx]

## Sheet: Sheet1
Time	Species	Nematode inoculation dose （no/plant）	Survival status
7 days	PM	2000	L	L	L	L	L	L	L	L	L	L	L	L	L	L	L	L	L	L	L	L	L	L	L	L
		4000	L	L	L	L	L	L	L	L	L	L	L	L	L	L	L	L	L	L	L	L	L	L	L	L
		8000	L	L	L	L	L	L	L	L	L	L	L	L	L	L	L	L	L	L	L	L	L	L	L	L
	EH	2000	L	L	L	L	L	L	L	L	L	L	L	L	L	L	L	L	L	L	L	L	L	L	L	L
		4000	L	L	L	L	L	L	L	L	L	L	L	L	L	L	L	L	L	L	L	L	L	L	L	L
		8000	L	L	L	L	L	L	L	L	L	L	L	L	L	L	L	L	L	L	L	L	L	L	L	L
	PEE	2000	L	L	L	L	L	L	L	L	L	L	L	L	L	L	L	L	L	L	L	L	L	L	L	L
		4000	L	L	L	L	L	L	L	L	L	L	L	L	L	L	L	L	L	L	L	L	L	L	L	L
		8000	L	L	L	L	L	L	L	L	L	L	L	L	L	L	L	L	L	L	L	L	L	L	L	L
14 days	PM	2000	L	L	L	L	L	L	L	L	L	L	L	L	L	L	L	L	L	L	L	L	L	L	L	L
		4000	L	L	L	L	L	L	L	L	L	L	L	L	L	L	L	L	L	L	L	L	L	L	L	L
		8000	L	L	L	L	L	L	L	L	L	L	L	L	L	L	L	L	L	L	L	L	L	L	L	L
	EH	2000	L	L	L	L	L	L	L	L	L	L	L	L	L	L	L	L	L	L	L	L	L	L	L	L
		4000	L	L	L	L	L	L	L	L	L	L	L	L	L	L	L	L	L	L	L	L	L	L	L	L
		8000	L	L	L	L	L	L	L	L	L	L	L	L	L	L	L	L	L	L	L	L	L	L	L	L
	PEE	2000	L	L	L	L	L	L	L	L	L	L	L	L	L	L	L	L	L	L	L	L	L	L	L	L
		4000	L	L	L	L	L	L	L	L	L	L	L	L	L	L	L	L	L	L	L	L	L	L	L	L
		8000	L	L	L	L	L	L	L	L	L	L	L	L	L	L	L	L	L	L	L	L	L	L	L	L
21 days	PM	2000	L	L	L	L	L	L	L	L	L	L	L	L	L	L	L	L	L	L	L	L	L	L	L	L
		4000	L	L	L	L	L	L	L	L	L	L	L	L	L	L	L	L	L	L	L	L	L	L	D	D
		8000	L	L	L	L	L	L	L	L	L	L	L	L	L	L	L	L	L	L	L	L	L	L	L	L
	EH	2000	L	L	L	L	L	L	L	L	L	L	L	L	L	L	L	L	L	L	L	L	L	L	L	L
		4000	L	L	L	L	L	L	L	L	L	L	L	L	L	L	L	L	L	L	L	L	L	L	D	D
		8000	L	L	L	L	L	L	L	L	L	L	L	L	L	L	L	L	L	L	L	L	D	D	D	D
	PEE	2000	L	L	L	L	L	L	L	L	L	L	L	L	L	L	L	L	L	L	L	L	L	L	L	L
		4000	L	L	L	L	L	L	L	L	L	L	L	L	L	L	L	L	L	L	L	L	L	L	L	L
		8000	L	L	L	L	L	L	L	L	L	L	L	L	L	L	L	L	L	L	L	L	L	L	L	L
28 days	PM	2000	L	L	L	L	L	L	L	L	L	L	L	L	L	L	L	L	L	L	L	L	D	D	D	D
		4000	L	L	L	L	L	L	L	L	L	L	L	L	L	L	L	L	L	L	L	L	D	D	D	D
		8000	L	L	L	L	L	L	L	L	L	L	L	L	L	L	D	D	D	D	D	D	D	D	D	D
	EH	2000	L	L	L	L	L	L	L	L	L	L	L	L	L	L	L	L	L	L	L	L	D	D	D	D
		4000	L	L	L	L	L	L	L	L	L	L	L	L	L	L	L	L	L	L	D	D	D	D	D	D
		8000	L	L	L	L	L	L	L	L	D	D	D	D	D	D	D	D	D	D	D	D	D	D	D	D
	PEE	2000	L	L	L	L	L	L	L	L	L	L	L	L	L	L	L	L	L	L	L	L	L	L	L	L
		4000	L	L	L	L	L	L	L	L	L	L	L	L	L	L	L	L	L	L	L	L	L	L	L	L
		8000	L	L	L	L	L	L	L	L	L	L	L	L	L	L	L	L	L	L	D	D	D	D	D	D
35 days	PM	2000	L	L	L	L	L	L	D	D	D	D	D	D	D	D	D	D	D	D	D	D	D	D	D	D
		4000	L	L	L	L	L	L	D	D	D	D	D	D	D	D	D	D	D	D	D	D	D	D	D	D
		8000	L	L	L	L	D	D	D	D	D	D	D	D	D	D	D	D	D	D	D	D	D	D	D	D
	EH	2000	L	L	L	L	L	L	L	L	L	L	L	L	L	L	L	L	D	D	D	D	D	D	D	D
		4000	L	L	L	L	L	L	L	L	D	D	D	D	D	D	D	D	D	D	D	D	D	D	D	D
		8000	D	D	D	D	D	D	D	D	D	D	D	D	D	D	D	D	D	D	D	D	D	D	D	D
	PEE	2000	L	L	L	L	L	L	L	L	L	L	L	L	L	L	L	L	D	D	D	D	D	D	D	D
		4000	L	L	L	L	L	L	L	L	D	D	D	D	D	D	D	D	D	D	D	D	D	D	D	D
		8000	L	L	L	L	L	L	D	D	D	D	D	D	D	D	D	D	D	D	D	D	D	D	D	D
note：L=live， D=dead
