# Supplementary material for: Species variability of Pinus elliottii, P. elliottii×P. caribaea, and P. massoniana in response to pinewood nematode infection
Source: PeerJ. 2025 Sep 5;13:e19990. doi: 10.7717/peerj.19990 (PMC12422270; doi:10.7717/peerj.19990)
Supplement: Supplemental Information 4 — ND, non detectable [file peerj-13-19990-s004.xlsx]

## Sheet: Sheet1
Portion	Species	Nematode inoculation dose （no/plant）	Nematode density （no /g wood）
Upper portion	PM	2000	110.75	155	134.56	178.54	208.25	148.99	159.99	174.29	131.22	188.12	165.43	122.91	149.87	167.45	149.9	142.15	115.67	199.01	129.03	144.76	143.21	137.77	170.88	163.29
		4000	185.38	237.22	127.85	294.49	130.17	291.15	135.42	286.92	142.56	279.78	148.34	273	153.89	268.45	160.21	262.13	167.04	255.3	172.95	249.39	178.5	243.84	183.72	238.62
		8000	256.41	227.38	268.86	233.12	263.12	238.12	258.12	229.5	266.74	230	265	231.25	264.75	235.67	260.57	237.89	258.35	240.12	256	241.33	254.85	242.6	ND	ND
	EH	2000	125.2	154.47	161.07	132.15	148.93	155.32	162.49	140.18	135.65	158.84	152.19	128.43	165.24	142.58	149.71	138.88	160.12	147.76	132.08	154.46	143.24	139.87	167.34	144.97
		4000	140	203.44	235.43	215.23	190.75	230.12	160.3	192.34	220.56	250.89	208.04	180.6	205.74	199.99	150.15	208.84	240.67	182.54	210.45	170.45	225.78	205.13	201.14	195.67
		8000	234.43	239.52	216.58	268.91	191.45	265.34	194.02	272.63	187.73	259.87	200.49	278.25	182.11	248.56	211.8	285.09	175.27	242.7	217.66	232.18	256.42	203.94	263.05	197.31
	PEE	2000	173.91	139.19	143.46	102.19	202.19	112.18	189.2	125.17	182.21	132.16	171.22	143.15	162.23	152.24	180.11	194.1	112.28	172.12	202.09	162.13	142.25	102.29	122.27	132.26
		4000	130.25	140.37	150.49	235.96	190.97	271.93	160.61	205.6	261.81	170.73	251.69	215.72	241.57	180.85	201.09	225.84	165.12	282.05	221.33	175.24	211.21	231.45	ND	ND
		8000	217.34	228.95	195.67	240.12	209.83	223.45	231.76	198.24	215.59	237.02	203.91	225.01	212.38	235.47	190.55	245.89	205.12	229.33	213.75	238.14	200.67	225.88	210.44	233.27
Lower portion	PM	2000	145.83	166.67	129.43	130.67	133.15	138.92	141.78	143.21	144.39	147.89	149.56	152.34	159.23	160.78	162.34	163.21	165.45	186.12	168.89	180.05	170.45	178.9	175.33	126
		4000	193.24	225.54	234.04	150.32	280.9	205.47	240.15	190.78	260.33	230	210.55	245.67	180.99	290.12	220.41	200.16	250.25	195.3	265.89	235.71	240.88	185.43	270.54	225.1
		8000	243.57	267.89	258.34	230.15	275.48	239.76	261.05	221.94	249.81	282.47	236.02	259.97	248.2	270.33	232.58	265.91	228.43	263.28	240.89	251.66	277.12	285.04	ND	ND
	EH	2000	138.31	152.38	154.39	125.47	132.15	140.05	142.56	145.67	155.55	148	150.78	185.67	190.22	165.78	157.83	172.35	160.12	163.21	180.34	175.9	168.99	170.24	122.33	171.13
		4000	193.44	220.91	204.59	165.23	247.85	178.56	234.67	189.72	215.38	201.04	226.95	195.17	239.12	172.84	251.03	187.29	211.45	198.33	228.76	181.09	243.5	169.74	256.18	192.05
		8000	222.22	239.48	247.42	232.15	243.76	218.94	225.67	250.33	261.89	199.87	207.53	255.41	274.62	189.25	310.78	172.34	286.17	154.92	295.04	228.71	214.08	265.23	240.95	223.16
	PEE	2000	159.33	146.73	144.14	130.15	170.22	155.67	145.3	160.45	140.12	165.89	135.74	157.21	143.56	162.38	138.47	168.91	133.25	172.16	128.39	175.04	125.98	158.32	142.67	148.79
		4000	160.15	219.11	222.33	228.77	206.23	209.45	180.47	183.69	202.01	231.99	177.25	212.97	215.89	164.37	168.59	170.81	174.03	235.21	238.93	241.65	246.4	251.55	ND	ND
		8000	218.18	235.29	227.35	222.47	230.12	215.89	240.56	220.03	232.18	210.45	245.67	200.97	250.88	195.34	260.12	190.28	265.43	185.67	270.19	180.92	275.05	205.76	280.14	225.97
ND=non detectable
